# Supplementary material
Source: PubMed Central journal article supplement (PMC7594259)
Supplement: NIHMS1573039-supplement-SuperChargeSupportingMaterial.pdf [file NIHMS1573039-supplement-SuperChargeSupportingMaterial.pdf]

# ADVANCED FUNCTIONAL MATERIALS

## Supporting Information

for *Adv. Funct. Mater.*, DOI: 10.1002/adfm.201805105

Super Charge Separation and High Voltage Phase in  $\text{Na}_x\text{MnO}_2$

*Xi Chen, Yichao Wang, Kamila Wiaderek, Xiahan Sang, Olaf Borkiewicz, Karena Chapman, James LeBeau, Jeffrey Lynn, and Xin Li\**

## Supporting Information

Super charge separation and high voltage phase in  $\text{Na}_x\text{MnO}_2$ 

Xi Chen, Yichao Wang, Kamila Wiaderek, Xiahan Sang, Olaf Borkiewicz, Karena Chapman, James LeBeau, Jeffrey Lynn and Xin Li\*

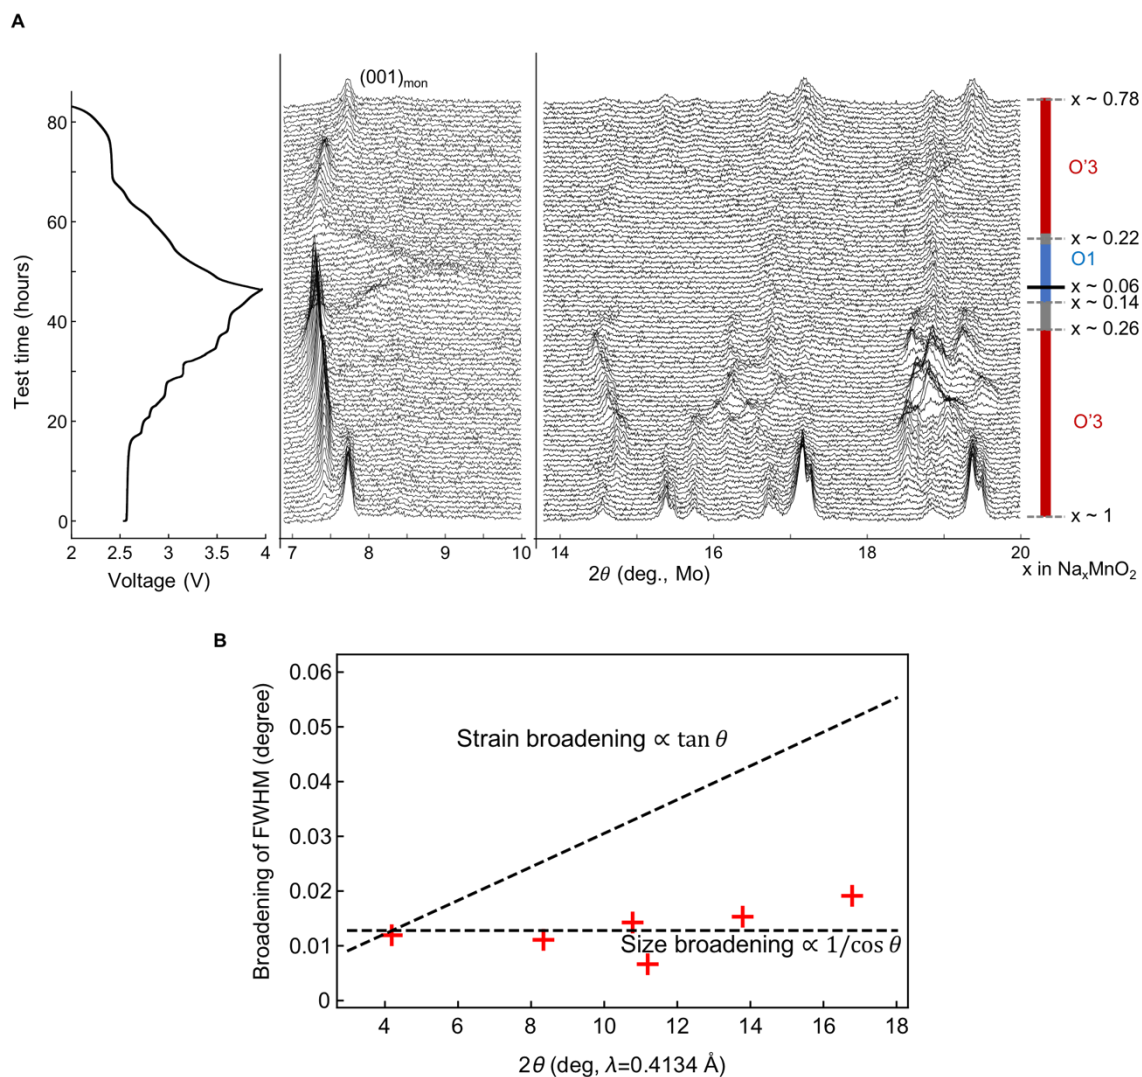

**Figure S1 | *In-situ* lab XRD measurement of the first cycle of  $\text{NaMnO}_2$ .** (A), Left panel: Voltage curve of the  $\text{NaMnO}_2$  *in-situ* cell of the first cycle at C/50 rate, from 2V to 4V. Middle and right panel: *In-situ* XRD profiles collected with Mo source ( $K_{\alpha 1}$  wavelength: 0.7093 Å) and the corresponding phase evolution. The O'3-O1 phase evolution is very close to the evolution identified from the *in-situ* SXRD cell. (B), Strain versus size broadening analysis. Red markers are the broadening of a series of peaks from O'3 to O1 in SXRD measurement (Fig.

2 in Main Text). Dashed lines stand for the angle dependence of size broadening and strain broadening.

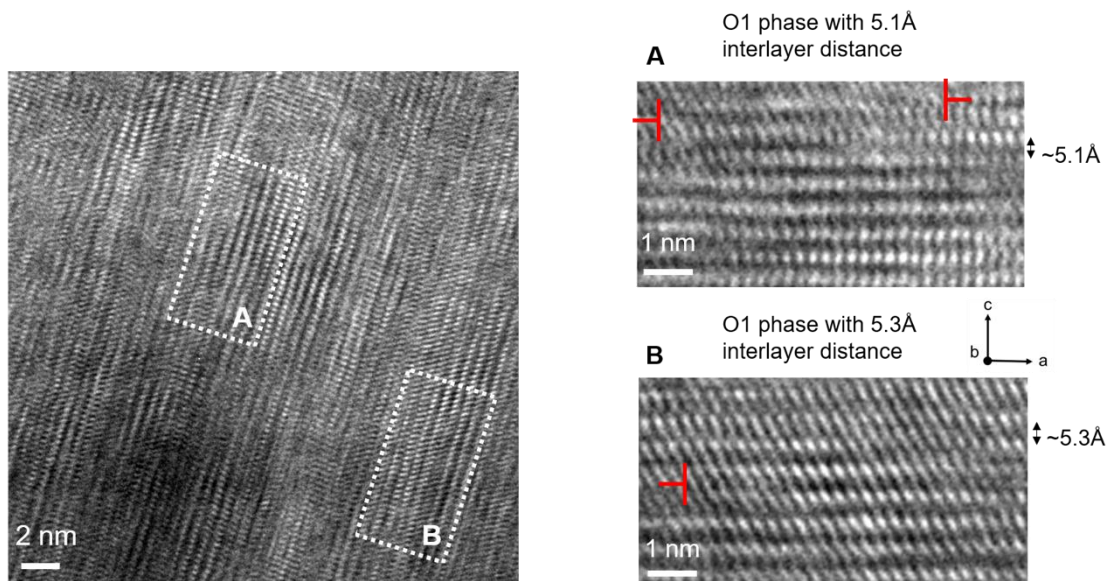

**Figure S2 | HRTEM images of  $\text{NaMnO}_2$  charged to 4.0V taken in  $b$  direction. O1 phase with interlayer distance around 5.1 Å (A) and 5.3 Å (B). Defects (marked with red) can be found in the images.**

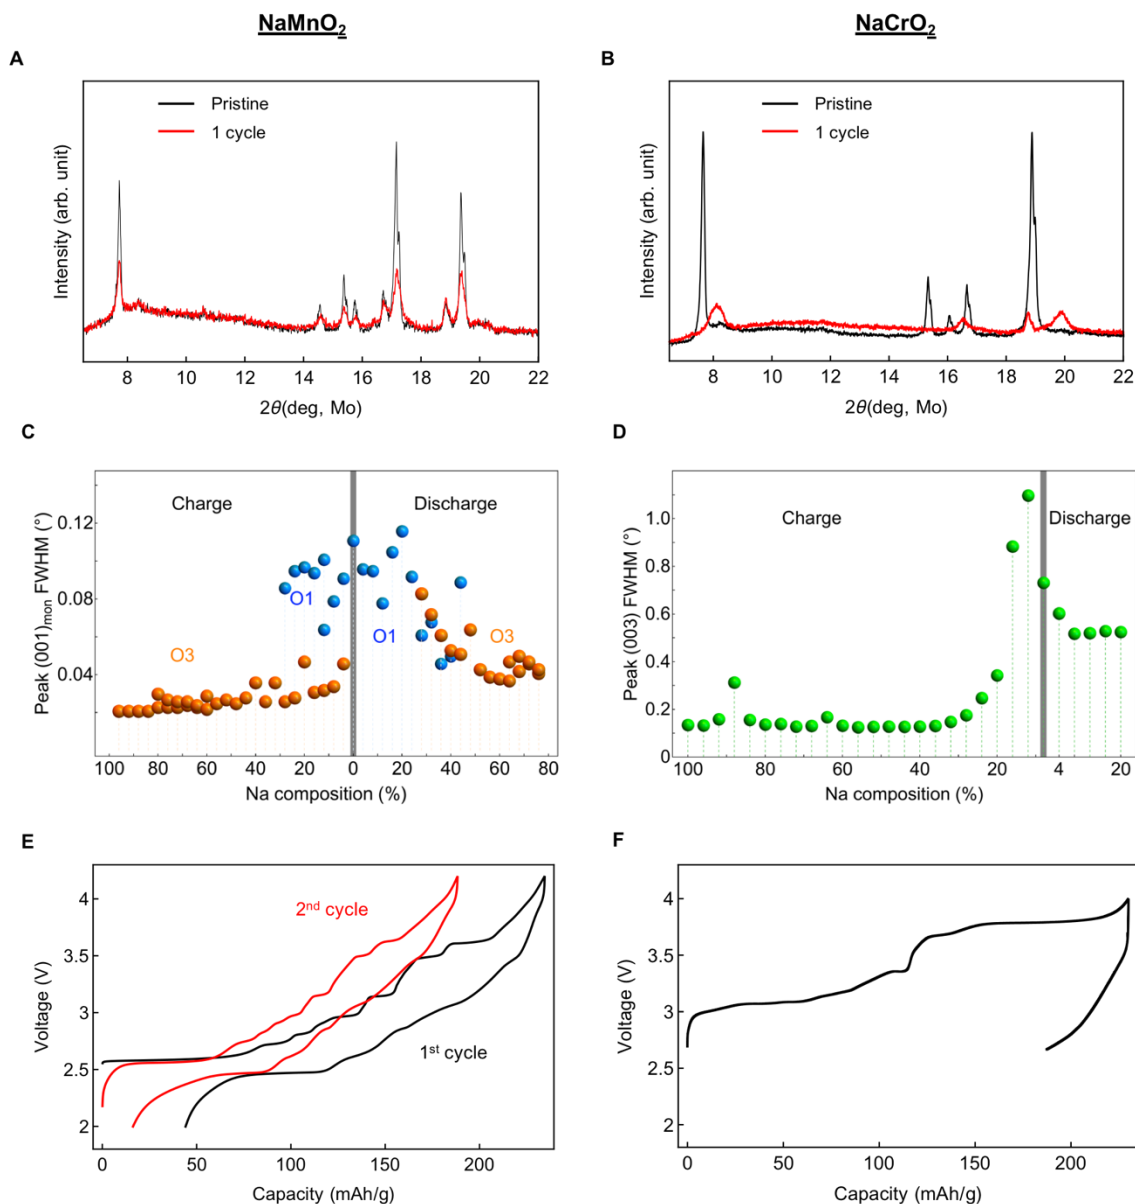

**Figure S3 | Reversible evolution of NaMnO<sub>2</sub> and irreversible evolution of NaCrO<sub>2</sub>.** (A) *in-situ* XRD profiles of pristine and one cycled NaMnO<sub>2</sub>. The peak positions are well matched. (B) *in-situ* XRD profiles of pristine and one cycled NaCrO<sub>2</sub>. The peak profile after one cycle is greatly changed. (C, D) Evolution of the FWHM of monoclinic (001) peak for NaMnO<sub>2</sub> by *in-situ* synchrotron XRD and (003) peak for NaCrO<sub>2</sub> measured by *in-situ* lab XRD during the first cycle. (E) charge-discharge curves of NaMnO<sub>2</sub> in the first and second cycle from 2V to 4.2V. The charge and discharge curves are asymmetric in each cycle, but with largely reversible features from cycle to cycle. (F) Irreversible charge-discharge evolution of NaCrO<sub>2</sub>.

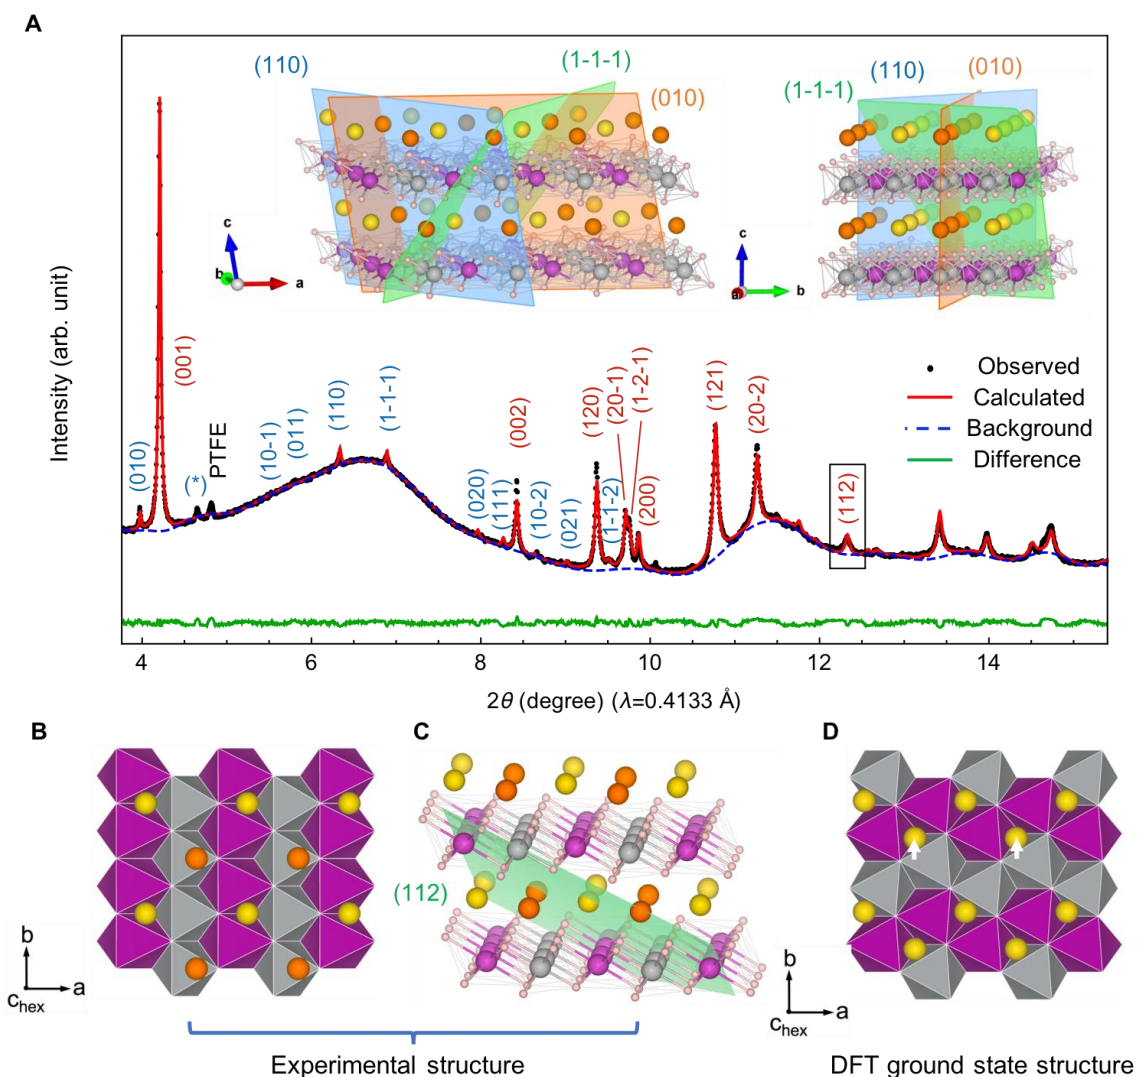

**Figure S4 | Rietveld refinement of the *in-situ* SXR for  $\text{Na}_{0.5}\text{MnO}_2$  (Space group:  $P2/m$ ) superstructure.** (A) The SXR refinement. The refined lattice parameter, the coordinate of ions and Na-O and Mn-O bond lengths are shown in Table S1 and S2. The hkl labels are based on the refined supercell, and the superstructure peaks are indexed in blue. Three planes, (110), (1-1-1) and (010) that contribute to the three strongest superstructure peaks, are illustrated in the two insets. (\*) is at the (400) superstructure peak position of  $\text{Na}_{5/8}\text{MnO}_2$ <sup>1</sup> that does not completely disappear yet. (B) The basal  $\text{MnO}_2$  and Na plane of the reported Na-1/2 ordering structure from SXR experiments, also shown in Figure 3 of the Main Text. (C) The illustration of the (112) plane in the experimental structure, cutting exactly through the displaced Na sites and making itself observable in the SXR measurement. (D) The DFT ground state of Na-1/2 ordering provided by reference 33 of the Main Text. The movement of

Na away from the displaced site breaks the (112) plane and results in the (112) peak extinguishment in the XRD refinement, leading to worse refinement.

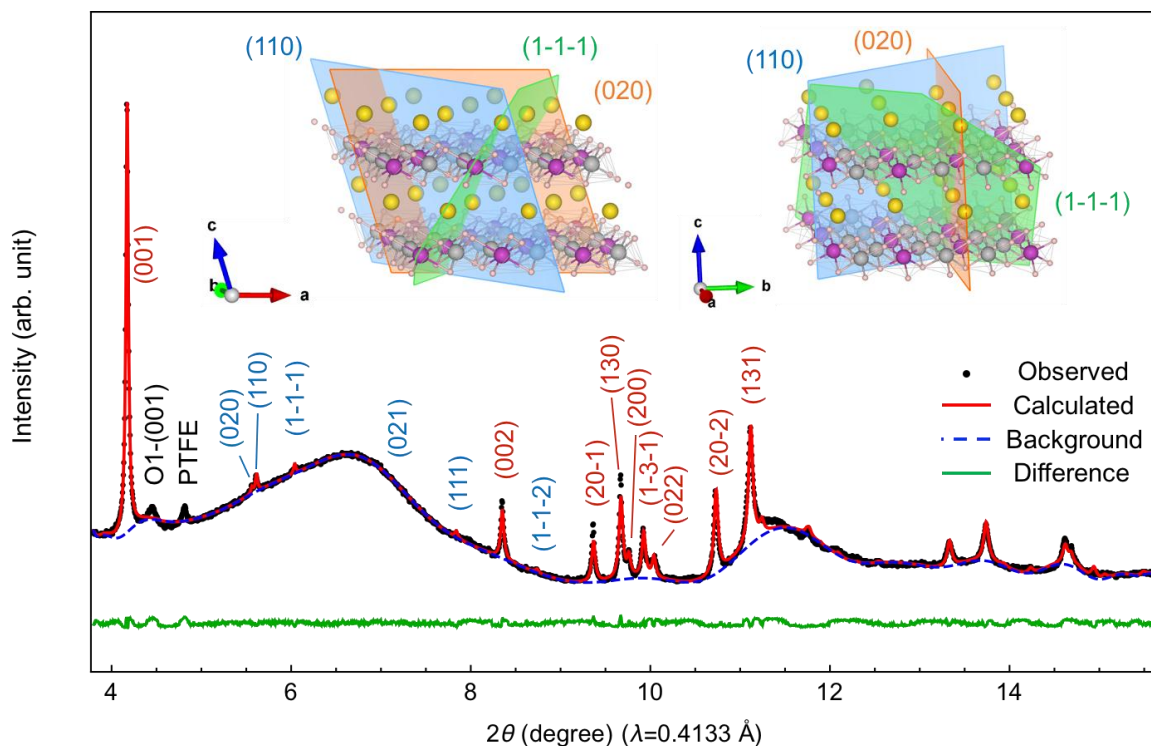

**Figure S5 | Rietveld refinement of the *in-situ* SXR for  $\text{Na}_{1/3}\text{MnO}_2$  (Space group:  $\text{C2/m}$ ) superstructure.** The refined lattice parameter, the coordinate of ions and Na-O and Mn-O bond lengths are shown in Table S3 and S4. The hkl labels are based on the refined supercell, and the superstructure peaks are indexed in blue. Three planes, (110), (1-1-1) and (020) that contribute to the three strongest superstructure peaks, are illustrated in the two insets.

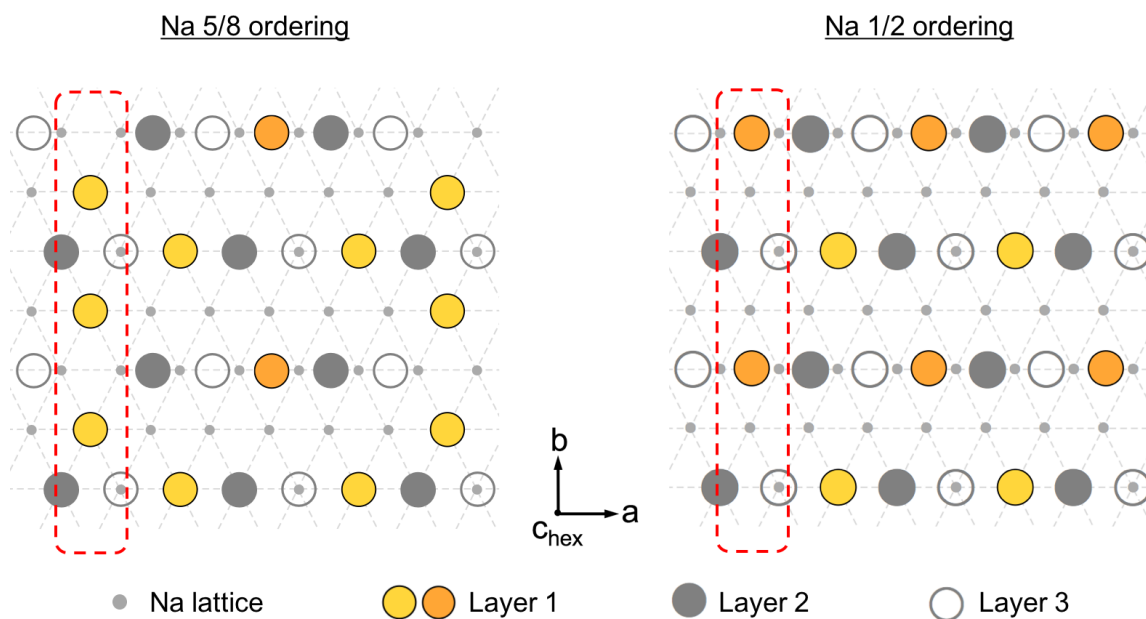

**Figure S6 | Superstructure evolution from  $\text{Na}_{5/8}\text{MnO}_2$  to  $\text{Na}_{0.5}\text{MnO}_2$ .** The only full-Na row in  $\text{Na}_{5/8}\text{MnO}_2$ <sup>1</sup> evolves to a displaced half-Na row in  $\text{Na}_{0.5}\text{MnO}_2$  (red dashed boxes) upon 1/8 de-intercalation of the total Na composition, while the other three rows of Na ions are at the same positions.

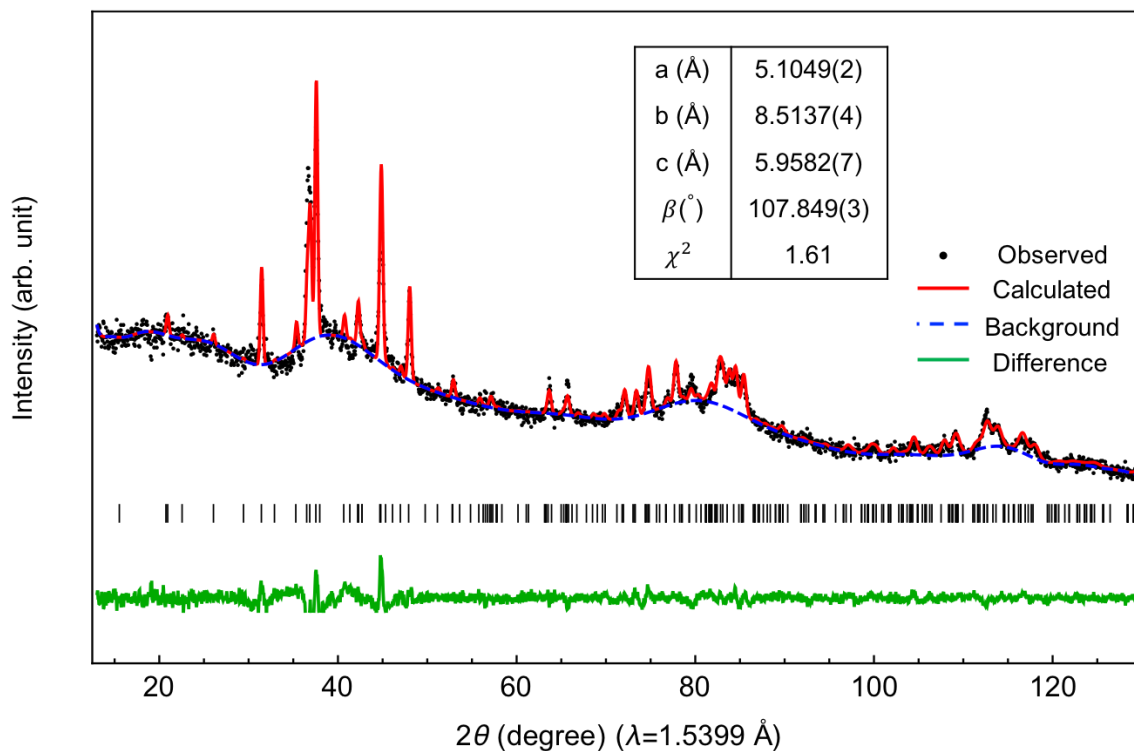

**Figure S7 | Refinement of  $\text{Na}_{1/3}\text{MnO}_2$  neutron diffraction pattern at room temperature.**

Same supercell as shown in Table. S3 for Na-1/3 XRD refinement is used. The refined lattice parameters (inset) are used as reference for simulating low-temperature magnetic peaks.

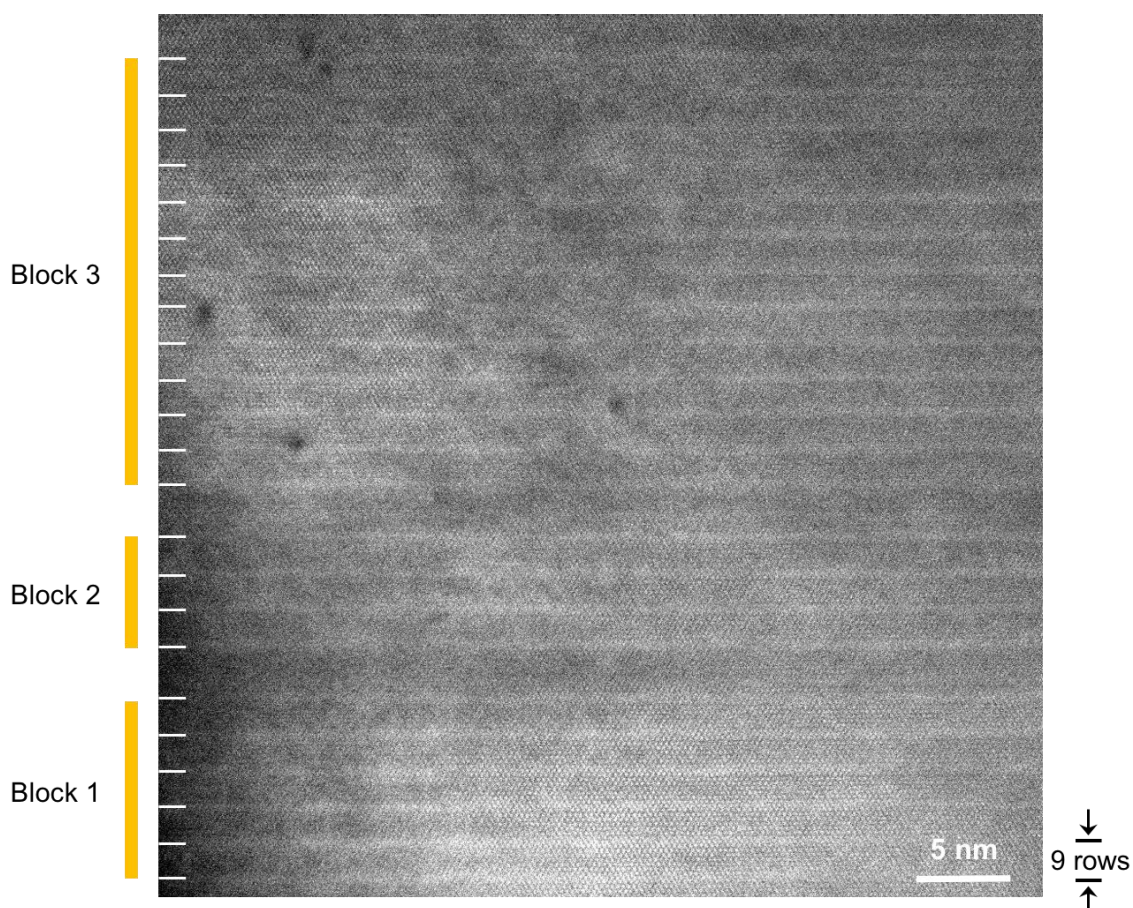**Figure S8 | Low magnification STEM image along [101] direction of  $\text{Na}_{0.06}\text{MnO}_2$  at 4.0V.**

The distance between bright stripes are 9 rows within each block, as marked by yellow bars.

White rods indicate the center of each Na stripe.



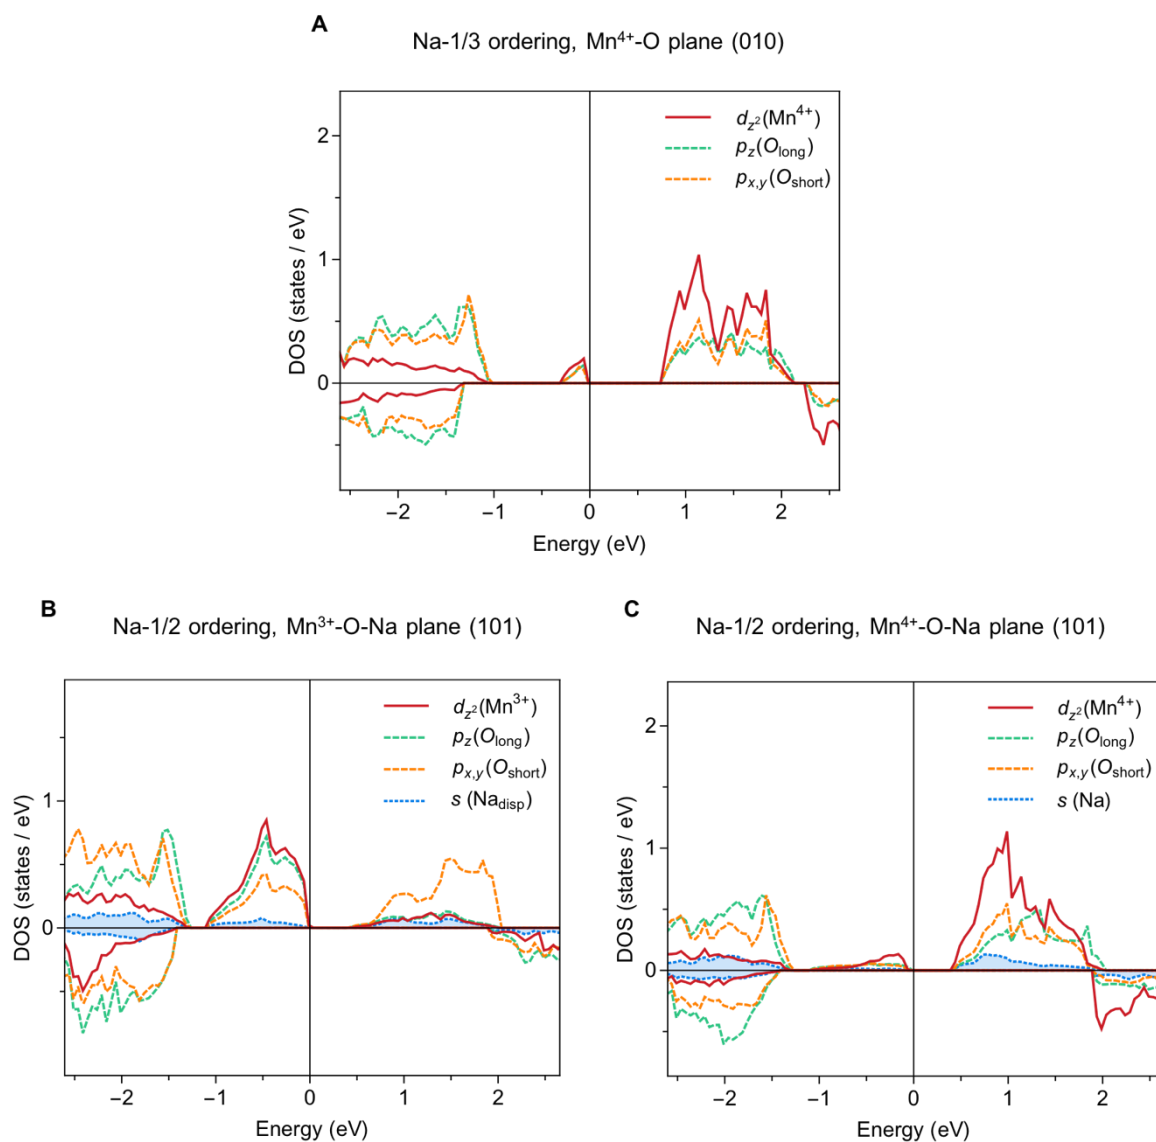

**Figure S9 | DOS of the  $d_z^2$  orbital of Mn, the p orbitals of O and the s orbital of Na in the super-plane of Na -1/2 and Na -1/3 orderings.** The DOS calculation of the Mn<sup>3+</sup> super-plane of Na-1/3 ordering is in Fig. 7A of the Main Text. The definition of x, y, and z is also following Fig. 7A, with z being the JT long axis. Note that Na is absent in the Mn<sup>4+</sup> super-plane for Na-1/3 ordering. The magnitude of DOS is square root of the calculated value. The DOS peaks corresponding to s induced pd hybridization below the Fermi level in the Mn<sup>4+</sup> super-plane is more than an order of magnitude lower than in the Mn<sup>3+</sup> super-planes, showing that such hybridization is strongly coupled with JT active Mn<sup>3+</sup>.

| O'3-Na <sub>1/2</sub> MnO <sub>2</sub> |                     | a[Å]       | b[Å]      | c[Å]      | β[deg]     | Space group |
|----------------------------------------|---------------------|------------|-----------|-----------|------------|-------------|
|                                        |                     | 4.9621(5)  | 5.9485(8) | 5.8088(9) | 104.485(8) | P/2m        |
| #                                      | Atom                | Site       | x         | y         | z          | Beq.        |
| 1                                      | Mn1(4+)             | 1d         | 0         | 0         | 0.5        | 5.1569(8)   |
| 2                                      | Mn2(3+)             | 2l         | 0.5       | 0.7387(0) | 0.5        | 4.9511(3)   |
| 3                                      | Mn3(4+)             | 1e         | 0         | 0.5       | 0.5        | 4.4413(5)   |
| 4                                      | O1                  | 4o         | 0.1953(0) | 0.7298(0) | 0.6770(0)  | 4.2525(9)   |
| 5                                      | O2                  | 2n         | 0.7235(0) | 0.5       | 0.6652(3)  | 2.7089(1)   |
| 6                                      | O3                  | 2m         | 0.6987(1) | 0         | 0.6421(0)  | 3.3698(7)   |
| 7                                      | Na1 <sub>disp</sub> | 1f         | 0.5       | 0.5       | 0          | 0           |
| 8                                      | Na2                 | 1a         | 0         | 0         | 0          | 17.9586(4)  |
| Agreement factors:                     |                     | Rexp=1.48% | Rwp=3.51% | Rp=2.43%  |            |             |

**Table S1 | The SXR D refinement result of Na<sub>1/2</sub>MnO<sub>2</sub> (space group P2/m).** Beq. is related to the isotropic thermal parameter. The ion coordinates are only allowed for less than 2% deviation in the refinement from the DFT relaxed input positions.

| Atom                | Bond   | Bond Length(Å) | Multiplicity |
|---------------------|--------|----------------|--------------|
| Mn1                 | Mn1-O1 | 2.0202(1)      | 4            |
|                     | Mn1-O3 | 1.8798(6)      | 2            |
| Mn2                 | Mn2-O1 | 2.0306(9)      | 2            |
|                     | Mn2-O2 | 1.9272(9)      | 2            |
|                     | Mn2-O3 | 1.9137(6)      | 2            |
| Mn3                 | Mn3-O1 | 1.8347(9)      | 4            |
|                     | Mn3-O2 | 1.8222(2)      | 2            |
| Na1 <sub>disp</sub> | Na1-O1 | 2.5011(7)      | 4            |

|     |        |           |   |
|-----|--------|-----------|---|
|     | Na1-O2 | 2.4970(0) | 2 |
| Na2 | Na2-O1 | 2.8200(4) | 4 |
|     | Na2-O3 | 2.2366(1) | 2 |

**Table S2** | Mn-O and Na-O distance calculated from the  $\text{Na}_{1/2}\text{MnO}_2$  structure after Rietveld refinement. Refinement indicates two long Mn-O bonds and four short bonds for Mn2, which is also the JT active  $\text{Mn}^{3+}$  according to DFT calculation.

| O'3- $\text{Na}_{1/3}\text{MnO}_2$ |         | a[Å]       | b[Å]      | c[Å]      | $\beta$ [deg] | Space group |
|------------------------------------|---------|------------|-----------|-----------|---------------|-------------|
|                                    |         | 5.0610(2)  | 8.4482(5) | 5.9127(5) | 107.852(3)    | C/2m        |
| #                                  | Atom    | Site       | x         | y         | z             | Beq.        |
| 1                                  | Mn1(3+) | 2a         | 0         | 0         | 0             | 0           |
| 2                                  | Mn2(4+) | 4g         | 0.5       | 0.1618(1) | 0             | 5.922       |
| 3                                  | O1      | 4i         | 0.6867(0) | 0         | 0.1711(0)     | 14.38       |
| 4                                  | O2      | 8j         | 0.7568(0) | 0.1726(0) | 0.8324(2)     | 0.6848      |
| 5                                  | Na1     | 2d         | 0.5       | 0         | 0.5           | 5.422       |
| Agreement factors:                 |         | Rexp=1.46% | Rwp=3.48% | Rp=2.44%  |               |             |

**Table S3** | The SXR D refinement result of  $\text{Na}_{1/3}\text{MnO}_2$  (space group C2/m). Beq. is related to the isotropic thermal parameter. The ion coordinates are only allowed for less than 2% deviation in the refinement from the DFT relaxed input positions.

| Atom | Bond   | Bond Length(Å) | Multiplicity |
|------|--------|----------------|--------------|
| Mn1  | Mn1-O1 | 2.1263(2)      | 2            |
|      | Mn1-O2 | 1.9685(7)      | 4            |
| Mn2  | Mn2-O1 | 1.7885(5)      | 2            |

|     |        |           |   |
|-----|--------|-----------|---|
|     | Mn2-O2 | 1.8624(9) | 2 |
|     | Mn2-O2 | 1.9251(2) | 2 |
| Na1 | Na1-O1 | 2.4085(9) | 2 |
|     | Na1-O2 | 2.4723(1) | 4 |

---

**Table S4** | Mn-O and Na-O distance calculated from the  $\text{Na}_{1/3}\text{MnO}_2$  structure after Rietveld refinement. Refinement indicates two long Mn-O bonds and four short bonds for Mn2, which is also the JT active  $\text{Mn}^{3+}$  according to DFT calculation.

- 1 X. Li, X. Ma, D. Su, L. Liu, R. Chisnell, S. P. Ong, H. Chen, A. Toumar, J. Idrobo, Y. Lei, J. Bai, F. Wang, J. W. Lynn, Y. S. Lee and G. Ceder, *Nat. Mater.*, 2014, **13**, 586–592.
